# Supplementary material for: CLIMBING UP THE POTENTIAL WELL: LONG-PATH IR DIODE LASER SPECTRA OF THE CO-Ne COMPLEX
Source: Springer Nature journal article supplement (doi:10.1007/s10654-019-00558-7), 1997-01-01
Supplement: MOESM1 [file 17146518]

# Validation of multiple sclerosis diagnoses in the Swedish National Patient Register

European Journal of Epidemiology

Chantelle Murley<sup>1</sup>, Emilie Friberg<sup>1</sup>, Jan Hillert<sup>2</sup>, Kristina Alexanderson<sup>1</sup>, Fei Yang<sup>1</sup>

<sup>1</sup> Division of Insurance Medicine, Department of Clinical Neuroscience, Karolinska Institutet, SE-171 77 Stockholm, Sweden.

<sup>2</sup> Division of Neurology, Department of Clinical Neuroscience, Karolinska Institutet, SE-171 77 Stockholm, Sweden.

Corresponding author: Chantelle Murley: chantelle.murley@ki.se

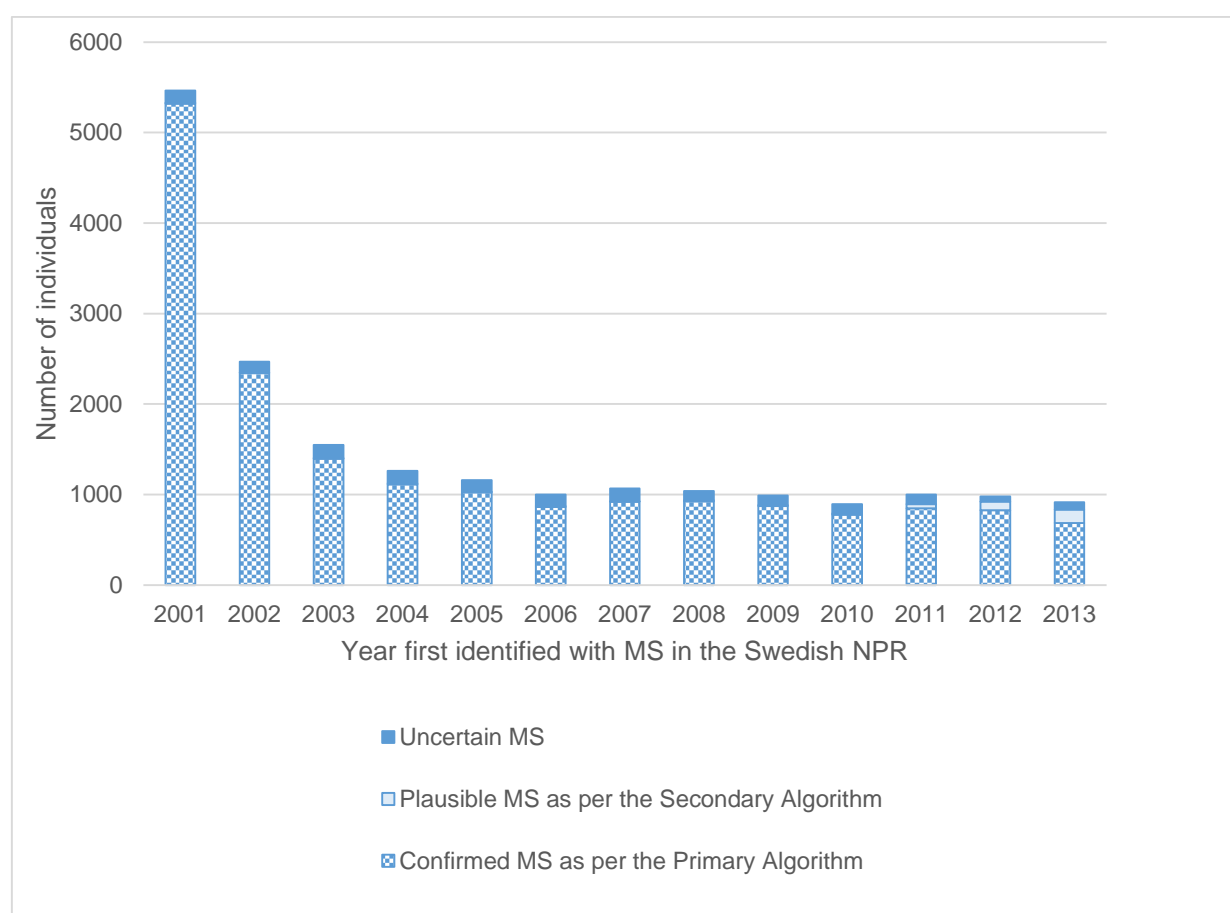

**Online Resource 1** Proportions of the registered MS cases per year of first appearance in the Swedish National Patient Register (NPR) during 2001-2013 which are confirmed or remained uncertain after both of the two case-definition algorithms

*Notes:* Year the individual first appears in the NPR within the study period of 2001-2013.  
*Abbreviations:* MS: multiple sclerosis, NPR: National Patient Register.
